# Supplementary material
Source: ML conference proceedings conference paper supplement (https://aclanthology.org/D14-1225)
Supplement: Attachment [file D14-1225.Attachment.zip]

# Appendix for Prune-and-Score: Learning for Greedy Coreference Resolution

Chao Ma, Janardhan Rao Doppa<sup>†</sup>, J. Walker Orr, Prashanth Mannem

Xiaoli Fern, Tom Dietterich and Prasad Tadepalli

School of Electrical Engineering and Computer Science, Oregon State University

{machao, orr, mannem, xfern, tgd, tadepalli}@eecs.oregonstate.edu

<sup>†</sup> School of Electrical Engineering and Computer Science, Washington State University

jana@eecs.wsu.edu

## Appendix A. Pseudocode for Pruning and Scoring Function Learning

### Algorithm 1 Pruning Function Learning

**Input:**  $\mathcal{D}$  = Training data,  $(I, A, T)$  = Search space,  $b$  = Pruning parameter

- 1: Initialize the set of ranking examples  $\mathcal{R} = \emptyset$
- 2: **for** each training example  $(x, y^*) \in \mathcal{D}$  **do**
- 3:    $s \leftarrow I(x)$  // initial state
- 4:   **while** not  $T(s)$  **do**
- 5:     Generate an example  $R_t$  to imitate this search step
- 6:     Aggregate training data:  $\mathcal{R} = \mathcal{R} \cup R_t$
- 7:      $s \leftarrow$  Apply  $a^*$  on  $s$
- 8:   **end while**
- 9: **end for**
- 10:  $\mathcal{F}_{prune} = \text{Rank-Learner}(\mathcal{R})$
- 11: **return** pruning function  $\mathcal{F}_{prune}$

## Appendix B. Proof for Expressiveness of the Prune-and-Score Approach

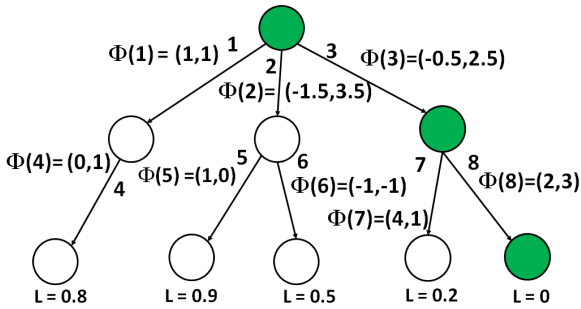

Figure 1: An example that illustrates that methods that use only scoring function for search can suffer arbitrary large loss compared to Prune-and-Score approach.

**Proposition 1.** Let  $\mathcal{F}_{prune}$  and  $\mathcal{F}_{score}$  be functions from the same function space. Then for all learning problems,  $\min_{\mathcal{F}_{score}} \mathcal{E}(\mathcal{F}_{prune}, \mathcal{F}_{score}) \geq \min_{(\mathcal{F}_{prune}, \mathcal{F}_{score})} \mathcal{E}(\mathcal{F}_{prune}, \mathcal{F}_{score})$ . Moreover there exist learning problems for which  $\min_{\mathcal{F}_{score}} \mathcal{E}(\mathcal{F}_{prune}, \mathcal{F}_{score})$  can be arbitrarily worse than  $\min_{(\mathcal{F}_{prune}, \mathcal{F}_{score})} \mathcal{E}(\mathcal{F}_{prune}, \mathcal{F}_{score})$ .

### Algorithm 2 Scoring Function Learning via Cross Validation

**Input:**  $\mathcal{D}$  = Training data,  $\mathcal{S}_p$  = Search space,  $b$  = Pruning parameter,  $\mathcal{F}_{score}^*$  = Optimal scoring function

- 1: Divide the training set  $\mathcal{D}$  into  $k$  folds  $\mathcal{D}_1, \mathcal{D}_2, \dots, \mathcal{D}_k$
- 2: // Learn  $k$  different pruning functions
- 3: **for**  $i = 1$  to  $k$  **do**
- 4:    $T_i = \bigcup_{j \neq i} \mathcal{D}_j$
- 5:    $\mathcal{F}_{prune}^i = \text{Learn-Pruner}(T_i, \mathcal{S}_p, b)$
- 6: **end for**
- 7: // Generate ranking examples for scoring function training
- 8: Initialize the set of ranking examples  $\mathcal{R} = \emptyset$
- 9: **for**  $i = 1$  to  $k$  **do**
- 10:   **for** each training example  $(x, y^*) \in \mathcal{D}_i$  **do**
- 11:      $s \leftarrow I(x)$  // initial state
- 12:     **while** not  $\text{Terminal}(s)$  **do**
- 13:        $A' \leftarrow$  Top  $b$  actions from  $A(s)$  according to  $\mathcal{F}_{prune}^i$
- 14:        $a^* \leftarrow \arg \max_{a \in A'} \mathcal{F}_{score}^*(s, a)$
- 15:       Generate ranking example  $R_t$  to imitate this search step
- 16:       Aggregate training data:  $\mathcal{R} = \mathcal{R} \cup R_t$
- 17:        $s \leftarrow$  Apply  $a^*$  on  $s$
- 18:     **end while**
- 19:   **end for**
- 20: **end for**
- 21:  $\mathcal{F}_{score} = \text{Rank-Learner}(\mathcal{R})$
- 22: **return** scoring function  $\mathcal{F}_{score}$

*Proof.* The first part of the proposition follows from the fact that the first minimization is over a subset of the choices considered by the second. For the second part, consider a problem with a single training instance with search space shown in Figure 2. We assume linear  $\mathcal{F}_{prune}$  and  $\mathcal{F}_{score}$  functions of features  $\Phi(n)$ , where  $n$  is an action. The highlighted nodes correspond to the target path. The Prune-and-Score approach with  $b = 2$  can find  $\mathcal{F}_{prune}$  and  $\mathcal{F}_{score}$  functions that are consistent with the target path. For example, with  $\mathcal{F}_{prune} = (1, 0)$  and  $\mathcal{F}_{score} = (1, 2)$  and pruning parameter 2 Prune-and-Score can achieve ze-

no loss on this problem. However, it can be verified that there is no set of weights that satisfies all the constraints for imitating the target path by the Scoring-Only approach ( $\mathcal{F}_{score}(3) > \mathcal{F}_{score}(2)$  and  $\mathcal{F}_{score}(8) > \mathcal{F}_{score}(7)$  in particular).  $\square$
